# Supplementary material for: A novel algorithm for cardiovascular screening using conjunctival microcirculatory parameters and blood biomarkers
Source: PubMed Central journal article supplement (PMC9023476; doi:10.1038/s41598-022-10491-7), 2022-04-21
Supplement: 41598_2022_10491_MOESM1_ESM.pdf [file 41598_2022_10491_MOESM1_ESM.pdf]

A novel algorithm for cardiovascular screening using conjunctival microcirculatory parameters and blood biomarkers

**Author list**

Agnes Awuah<sup>1</sup>, Julie S. Moore<sup>1</sup>, M. Andrew Nesbit<sup>1</sup>, Mark Ruddock<sup>2</sup>, Paul F. Brennan<sup>3</sup>, Jonathan A. Mailey<sup>3</sup>, Andrew J. McNeil<sup>4</sup>, Min Jing<sup>5</sup>, Dewar D. Finlay<sup>5</sup>, Emanuele Trucco<sup>4</sup>, Mary Jo Kurth<sup>2</sup>, Joanne Watt<sup>2</sup>, John Lamont<sup>2</sup>, Peter Fitzgerald<sup>2</sup>, Mark S. Spence<sup>3</sup>, James A. D McLaughlin<sup>5</sup>, Tara C.B. Moore<sup>1\*</sup>

**Corresponding author:** \*Professor Tara Moore (tara.moore@ulster.ac.uk)

**Institutions**

<sup>1</sup>*Biomedical Sciences Research Institute, Ulster University, Cromore Road, Coleraine, BT52 1SA, UK*

<sup>2</sup>*Radox Laboratories Ltd, Clinical Studies Group, Antrim BT29 4QY, UK*

<sup>3</sup>*Department of Cardiology, Royal Victoria Hospital, Belfast Health and Social Care Trust, 274 Grosvenor Road, Belfast BT12 6BA, UK*

<sup>4</sup>*VAMPIRE project, Computing (SSEN), University of Dundee, Dundee DD1 4HN, UK*

<sup>5</sup>*Nanotechnology and Integrated Bioengineering Centre (NIBEC), Ulster University, Jordanstown BT37 0QB, UK*

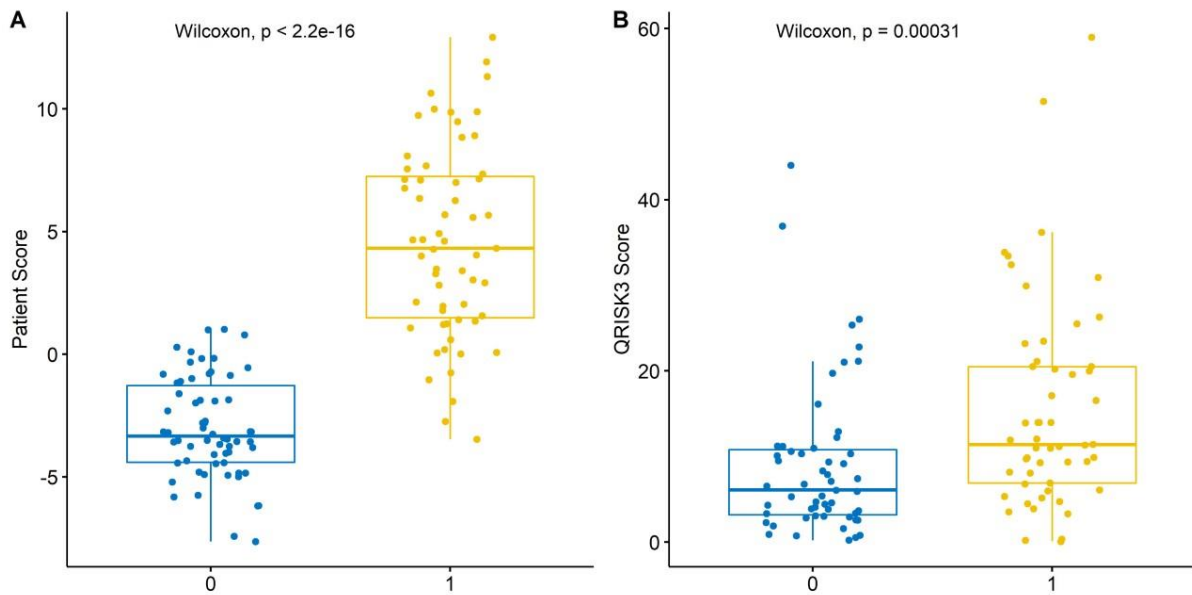

**Supplementary Figure 1:** Box plots comparing Patient Score to the QRISK3 score

*The Patient Score was derived from our algorithm. The linear regression equation for Patient Score =  $7.22 + -30.211 \cdot Vs + -3.248 \cdot \log_{10} \text{adiponectin} + 2.391 \cdot \log_{10} \text{Nt-proBNP}$ .*
